# Supplementary material for: Overgrazing-induced legacy effects may permit Leymus chinensis to cope with herbivory
Source: PeerJ. 2020 Oct 8;8:e10116. doi: 10.7717/peerj.10116 (PMC7548072; doi:10.7717/peerj.10116)
Supplement: Supplemental Information 7 [file peerj-08-10116-s007.xlsx]

## Sheet: Ramet (CK)
Material sourcre	Natural Height	Vertical Height	Stem Height	Leaf Length	Leaf Width	Leaf Number	Leaf Angle	Above 8 cm Biomass	Between 4-8 cm Biomass	Below 4 cm Biomass
OG-1	11	17.3	3.8	13.7	4.69	5	65	0.01	0.1098	0.0763
OG-2	15	18	4	13.8	5.32	7	65	0.081	0.1289	0.0683
OG-3	10.9	15.1	3.8	11.9	4.84	8	60	0.0257	0.1097	0.0714
OG-4	15.3	19	4.5	15	5.05	7	60	0.0847	0.1016	0.0524
OG-5	14	22.6	6.6	15.8	6.39	5	60	0.2104	0.1169	0.0695
OG-6	14.5	16.2	3.3	13	5.53	5	65	0.0173	0.1197	0.1019
OG-7	17.9	21.2	4.5	15.3	6.12	7	50	0.19	0.1344	0.0734
OG-8	12	12.8	3.7	9.8	3.58	7	55	0.0286	0.0564	0.0446
OG-9	13.7	14.9	4.8	11.4	3.7	7	60	0.0463	0.0599	0.038
OG-10	13.5	16.2	3.2	13.4	4.79	5	60	0.0211	0.0776	0.0725
OG-11	11.7	13.6	3.8	10.7	4.07	7	55	0.0242	0.0634	0.0673
OG-12	12.8	15.1	3.4	12.2	4.06	8	70	0.0181	0.0663	0.0975
OG-13	12.5	16.7	4	12.9	4.98	7	60	0.027	0.0834	0.1233
OG-14	17	17.3	4.3	12.1	5.5	7	65	0.0332	0.1516	0.0881
OG-15	11	15.2	3.7	11.7	3.97	7	65	0.0059	0.0857	0.0714
OG-16	15.5	16.5	4	10	5.27	6	65	0.0529	0.0389	0.0866
OG-17	13.7	16.3	3.2	12.5	4.56	6	65	0.1077	0.0692	0.0715
OG-18	16.8	20	5	15.2	5.82	6	50	0.1052	0.1658	0.0584
OG-19	12.8	17.3	4.3	12.5	5.19	6	60	0.0534	0.073	0.067
OG-20	12.8	16.6	4.3	12.9	4.88	7	65	0.0525	0.1138	0.0822
OG-21	14.6	20.5	5	15.7	6.12	5	65	0.1128	0.1022	0.0525
OG-22	12	16	3.7	12.7	4.85	6	60	0.056	0.0783	0.0722
NG-1	27	29.2	11.7	18	6.43	7	30	0.3187	0.0764	0.0463
NG-2	20.4	21.5	7	15.2	5.71	6	25	0.1431	0.0887	0.0587
NG-3	17.5	18.7	3.9	15.2	5.69	6	30	0.1082	0.0749	0.0504
NG-4	20.6	21	6.6	16.4	5.77	4	30	0.1249	0.0634	0.0422
NG-5	22.6	23.5	9	15.3	5.69	6	30	0.1964	0.072	0.0518
NG-6	26	26	11.5	16.5	5.27	6	30	0.2154	0.0452	0.0236
NG-7	25.6	26	10.2	17.6	6.08	7	25	0.2396	0.0927	0.0458
NG-8	20.3	21	9	15.6	4.89	5	25	0.1184	0.0348	0.0175
NG-9	19.6	21	4	15	6.19	7	20	0.1751	0.0937	0.0664
NG-10	25.5	26	11	15	5.39	7	25	0.2176	0.1075	0.0767
NG-11	21	21.5	7.3	15	5.17	5	30	0.1357	0.0512	0.0384
NG-12	14.9	18.9	3	15.5	3.36	7	25	0.0538	0.0545	0.0452
NG-13	15.6	18.5	4.7	14.1	5.9	5	25	0.1166	0.0848	0.0596
NG-14	25	26.3	9.8	17.8	6.3	5	30	0.223	0.0704	0.0539
NG-15	21.6	22	4.5	17.5	4.82	5	25	0.1549	0.0976	0.0519
NG-16	23.1	23.1	4.2	17.6	4.95	6	30	0.2251	0.0884	0.0573
NG-17	19.5	20	6.7	14.8	6.23	5	20	0.1272	0.0613	0.0391
NG-18	21.5	24.7	4.5	16.1	4.05	8	25	0.137	0.0967	0.068
NG-19	26.7	28.3	9.5	18.2	5.95	6	30	0.2371	0.0732	0.0533
NG-20	20.1	21	5.4	15.1	6.16	6	25	0.1196	0.0722	0.0585
NG-21	18	22	4.5	14.2	4.36	8	25	0.109	0.0913	0.0535
NG-22	18.5	20.1	3.7	16.8	5.57	6	25	0.0839	0.0667	0.0407

## Sheet: Genet (CK)
Material sourcre	Simulated herbivory Treatment	Tiller Ramet Number	Rhizome Ramet Number	Above 8 cm Biomass	Between 4-8 cm Biomass	Below 4 cm Biomass	Stem Biomass Belowground	Root Biomass	Rhizome Biomass	Total Rhizome Length	Rhizome Internode Number
OG-1	CK	4	10	0.0804	0.2683	0.7786	0.853	1.635	0.1272	16.2	10
OG-2	CK	8	4	0.1092	0.3748	0.494	0.4511	0.9751	0.2099	45	27
OG-3	CK	5	10	0.037	0.2732	0.417	0.4537	0.7725	0.2857	51.7	36
OG-4	CK	7	6	0.0136	0.2268	0.4615	0.3598	0.7723	0.1421	52.1	26
OG-5	CK	10	6	0.1683	0.5082	0.6924	0.8222	1.8553	0.6868	127.4	67
OG-6	CK	12	1	0.0276	0.324	0.6061	0.7273	1.266	0.2439	37.4	22
OG-7	CK	4	5	0.0436	0.2491	0.3642	0.6339	1.4116	0.2469	48.1	30
OG-8	CK	9	7	0.0256	0.2304	0.3205	0.3807	0.6037	0.1393	31.5	19
OG-9	CK	6	5	0.1091	0.2738	0.3287	0.5228	0.6712	0.1126	25.5	13
OG-10	CK	5	8	0.0472	0.1735	0.5485	0.5271	1.0081	0.3706	58.7	39
OG-11	CK	8	11	0.1139	0.355	0.4407	0.3617	0.7793	0.2186	50.4	25
OG-12	CK	7	8	0.1276	0.4159	0.374	0.44	0.8531	0.2595	45.9	31
OG-13	CK	3	8	0.0969	0.2407	0.4039	0.5033	0.9738	0.3469	72.6	38
OG-14	CK	5	7	0.1156	0.225	0.4328	0.4141	1.3978	0.2915	54.3	25
OG-15	CK	5	8	0.0245	0.2454	0.437	0.4438	0.64	0.198	38.5	25
OG-16	CK	4	7	0.013	0.2776	0.3766	0.4603	0.9175	0.3844	69	41
OG-17	CK	9	4	0.0186	0.327	0.506	0.5846	1.2172	0.1334	21.2	13
OG-18	CK	6	4	0.076	0.2329	0.39	0.5384	1.1136	0.3112	69.3	29
OG-19	CK	4	8	0.0343	0.1897	0.3641	0.38	0.6157	0.2017	36.7	22
OG-20	CK	8	6	0.0733	0.2505	0.3915	0.5534	0.8096	0.2273	38.7	28
OG-21	CK	3	10	0.0344	0.2332	0.3776	0.5203	1.0688	0.2781	62.8	32
OG-22	CK	7	11	0.0444	0.2125	0.6195	0.57	1.3632	0.3197	56.1	32
NG-1	CK	4	3	0.2719	0.2129	0.1624	0.3194	0.816	0.9034	165.1	86
NG-2	CK	3	5	0.1328	0.1753	0.2084	0.4078	0.6874	0.6022	129.9	75
NG-3	CK	6	5	0.2546	0.3033	0.2057	0.2448	0.9183	0.4839	76.2	44
NG-4	CK	8	4	0.2691	0.4413	0.368	0.4363	1.1517	0.4708	93.5	53
NG-5	CK	5	7	0.3539	0.2479	0.2889	0.3732	1.3658	0.6876	123.1	62
NG-6	CK	2	6	0.1542	0.2263	0.1774	0.1684	0.7102	1.159	191.5	95
NG-7	CK	2	15	0.2486	0.3246	0.3359	0.4267	1.5333	0.5437	90.3	40
NG-8	CK	6	6	0.2392	0.2999	0.2754	0.3001	0.7696	0.6604	75.3	76
NG-9	CK	4	6	0.1125	0.2281	0.229	0.2668	0.7611	0.3868	84.5	45
NG-10	CK	3	6	0.1373	0.2163	0.1834	0.1583	0.9305	0.9761	158.1	77
NG-11	CK	5	5	0.3039	0.2381	0.2798	0.4781	0.9419	0.6955	125.5	62
NG-12	CK	6	5	0.1029	0.1978	0.1412	0.1826	0.4353	0.1304	21.4	12
NG-13	CK	6	6	0.1974	0.3134	0.3477	0.3904	1.074	0.6104	81.2	43
NG-14	CK	3	5	0.3321	0.2442	0.2415	0.398	1.4397	0.9172	122.8	61
NG-15	CK	5	4	0.2155	0.299	0.2337	0.3969	1.4903	0.6414	107.4	47
NG-16	CK	6	3	0.144	0.2	0.1805	0.249	0.6626	0.3574	42.9	28
NG-17	CK	5	5	0.245	0.1785	0.2655	0.5107	1.2437	0.521	99	46
NG-18	CK	4	4	0.122	0.1421	0.1253	0.2455	0.5546	0.3909	77.3	36
NG-19	CK	2	7	0.251	0.2353	0.1872	0.1761	0.9251	0.6098	124.6	60
NG-20	CK	6	7	0.2695	0.2518	0.3039	0.3438	1.2163	0.6392	93.7	49
NG-21	CK	2	8	0.0732	0.1315	0.1477	0.224	0.5252	0.2432	68.1	34
NG-22	CK	7	6	0.2538	0.3713	0.2775	0.2052	0.8008	0.2474	60	33

## Sheet: Genet (H8)
Material sourcre	Simulated herbivory Treatment	Tiller Ramet Number	Rhizome Ramet Number	Biomass for the First Clipping	Biomass for the Second Clipping	Biomass for the Third Clipping	Above 8 cm Biomass	Between 4-8 cm Biomass	Below 4 cm Biomass	Stem Biomass Belowground	Root Biomass	Rhizome Biomass	Total Rhizome Length	Rhizome Internode Number
OG-1	H8	14	3	0.0236	0.0885	0.0622	0.0364	0.386	0.6327	0.679	1.0537	0.1984	36.9	20
OG-2	H8	8	6	0.0177	0.0622	0.0236	0.0066	0.3516	0.4867	0.302	0.7896	0.2223	62.4	39
OG-3	H8	5	6	0.0252	0.0735	0.0361	0.1078	0.3678	0.4945	0.3691	0.8309	0.2559	38.4	22
OG-4	H8	6	8	0.0766	0.1178	0.0086	0.0147	0.3622	0.4504	0.4735	0.9742	0.3195	64.3	38
OG-5	H8	11	6	0.0679	0.1123	0.1161	0.0153	0.5024	0.6844	0.6528	1.7234	0.2732	55.6	31
OG-6	H8	4	4	0.0249	0.0277	0.0181	0.0208	0.2872	0.3821	0.285	0.4572	0.2002	31.8	20
OG-7	H8	7	6	0.0268	0.0328	0.0684	0.0156	0.4577	0.4312	0.5578	0.872	0.2956	65.1	35
OG-8	H8	5	10	0.0683	0.2057	0.0874	0.0182	0.4768	0.5511	0.6502	1.0068	0.3888	56.7	35
OG-9	H8	12	5	0.0396	0.0798	0.0184	0.0171	0.4973	0.5674	0.6796	1.5088	0.1483	18.5	11
OG-10	H8	7	5	0.0425	0.0244	0.0409	0.0518	0.3523	0.3958	0.38	0.6309	0.3411	61.8	36
OG-11	H8	9	1	0.0645	0.1026	0.0451	0.042	0.5277	0.4783	0.436	0.645	0.2177	40.2	22
OG-12	H8	8	6	0.024	0.0728	0.0241	0.0611	0.5944	0.5907	0.5027	1.1641	0.2056	28.8	13
OG-13	H8	7	3	0.0569	0.1393	0.0647	0.0854	0.5058	0.4395	0.514	0.8716	0.1136	25.7	15
OG-14	H8	3	8	0.0252	0.1245	0.0432	0.051	0.3931	0.4529	0.4368	1.0456	0.3883	54.3	35
OG-15	H8	4	11	0.0136	0.0707	0.0398	0.0553	0.4375	0.3472	0.3997	0.644	0.2389	46.1	22
OG-16	H8	3	10	0.0272	0.0207	0.0323	0.0372	0.2566	0.3592	0.4216	0.7714	0.1527	33	21
OG-17	H8	4	9	0.0228	0.0392	0.0142	0.0672	0.3624	0.5611	0.3741	0.7326	0.2162	53.2	29
OG-18	H8	6	2	0.0152	0.0693	0.0155	0.0164	0.3116	0.3286	0.3546	0.5701	0.087	24.2	18
OG-19	H8	3	9	0.0641	0.1397	0.0271	0.0459	0.3954	0.5155	0.5042	1.1198	0.3136	51.6	27
OG-20	H8	4	9	0.0529	0.0842	0.0452	0.0077	0.4826	0.5449	0.3024	1.2812	0.2813	64.6	39
OG-21	H8	4	7	0.0164	0.0217	0.0237	0.0813	0.4013	0.3878	0.2544	0.592	0.2358	37.5	23
OG-22	H8	5	6	0.0435	0.074	0.0145	0.0315	0.2856	0.3966	0.3211	0.4223	0.1887	43.1	25
OG-23	H8	2	7	0.0695	0.1231	0.0135	0.0118	0.2514	0.4556	0.4336	0.8665	0.3005	57.6	33
OG-24	H8	9	7	0.0668	0.1769	0.0449	0.0071	0.4457	0.5939	0.6337	1.0176	0.4011	78.2	55
OG-25	H8	7	6	0.0287	0.1155	0.0295	0.0613	0.4426	0.5604	0.4972	0.8957	0.3455	70.1	46
OG-26	H8	6	3	0.1018	0.2438	0.0413	0.0315	0.5925	0.5591	0.5019	0.9541	0.5602	91.7	51
NG-1	H8	6	7	0.0889	0.1684	0.0309	0.1084	0.4793	0.3736	0.3356	0.7924	0.6236	117.8	61
NG-2	H8	1	9	0.1573	0.1344	0.078	0.1321	0.3481	0.3862	0.342	0.5423	0.3746	76.8	48
NG-3	H8	8	4	0.1044	0.1744	0.0864	0.0806	0.3717	0.2527	0.2764	0.6465	0.2787	65.4	36
NG-4	H8	3	8	0.1065	0.087	0.0484	0.1366	0.3814	0.2015	0.2428	0.4274	0.5255	120.8	64
NG-5	H8	8	5	0.318	0.3667	0.0921	0.0986	0.5013	0.3836	0.3349	0.8452	0.5642	101.2	41
NG-6	H8	7	3	0.3487	0.3868	0.099	0.0738	0.1649	0.1994	0.3213	0.9771	0.6426	115	53
NG-7	H8	3	8	0.1195	0.1236	0.0347	0.072	0.2833	0.3163	0.2131	0.8404	0.2246	58.1	31
NG-8	H8	3	6	0.0885	0.0978	0.0462	0.0916	0.3706	0.2981	0.2071	0.6171	0.4368	90.8	58
NG-9	H8	3	6	0.0402	0.084	0.0533	0.1353	0.2916	0.2274	0.2543	0.4689	0.1996	53.1	29
NG-10	H8	8	4	0.1022	0.2781	0.082	0.1159	0.5479	0.3894	0.4421	1.2989	0.5253	86.5	48
NG-11	H8	6	7	0.0556	0.0349	0.0395	0.1153	0.3662	0.2714	0.2996	0.4597	0.2415	44.9	23
NG-12	H8	4	6	0.0807	0.0594	0.0426	0.303	0.0887	0.2232	0.2024	0.3525	0.3098	48.8	25
NG-13	H8	4	7	0.0394	0.0377	0.0735	0.1247	0.2709	0.2464	0.2428	0.3418	0.1031	32.7	16
NG-14	H8	6	4	0.0106	0.0042	0.0042	0.047	0.1616	0.1701	0.097	0.3678	0.0417	14.9	6
NG-15	H8	4	2	0.021	0.0647	0.091	0.0852	0.2501	0.2167	0.2008	0.4771	0.253	54	28
NG-16	H8	3	8	0.1029	0.0757	0.051	0.1193	0.3543	0.3436	0.3866	0.6444	0.3207	87.1	45
NG-17	H8	2	9	0.0781	0.0967	0.0443	0.1113	0.4645	0.4121	0.413	0.549	0.365	70.7	39
NG-18	H8	9	5	0.0913	0.1316	0.0899	0.0563	0.4679	0.3643	0.4245	0.6472	0.2867	59.5	31
NG-19	H8	4	7	0.0592	0.0352	0.0444	0.1014	0.3952	0.3029	0.2193	0.4938	0.3488	62.1	40
NG-20	H8	1	5	0.0135	0.0065	0.0242	0.1556	0.4005	0.3265	0.1851	0.2594	0.2188	60.1	33
NG-21	H8	5	4	0.0528	0.0452	0.0332	0.171	0.3026	0.2192	0.2714	0.3933	0.1311	29.9	19
NG-22	H8	4	6	0.0557	0.097	0.0416	0.1148	0.3105	0.2393	0.2194	0.6609	0.4134	72.5	47
NG-23	H8	7	3	0.2036	0.2119	0.1046	0.1669	0.3752	0.229	0.2882	0.5107	0.5063	114.9	60
NG-24	H8	8	2	0.1081	0.1186	0.0407	0.0344	0.2464	0.269	0.1029	0.1629	0.0609	12.3	9
NG-25	H8	5	6	0.0741	0.1515	0.0438	0.1255	0.3324	0.2913	0.2317	0.459	0.3119	48.4	26
NG-26	H8	4	4	0.0484	0.0672	0.0425	0.1164	0.2299	0.1987	0.1726	0.4515	0.1919	61.2	31
NG-27	H8	2	8	0.1057	0.103	0.0415	0.1278	0.3608	0.3588	0.2781	0.5861	0.3893	78.4	46
NG-28	H8	7	4	0.0324	0.035	0.0379	0.1621	0.2672	0.2439	0.2103	0.4409	0.0842	17.8	10
NG-29	H8	6	3	0.1226	0.297	0.0987	0.1546	0.4597	0.2426	0.2238	0.4587	0.1998	48.1	26

## Sheet: Genet (H4)
Material sourcre	Simulated herbivory Treatment	Tiller Ramet Number	Rhizome Ramet Number	Biomass for the First Clipping	Biomass for the Second Clipping	Biomass for the Third Clipping	Above 4 cm Biomass	Below 4 cm Biomass	Stem Biomass Belowground	Root Biomass	Rhizome Biomass	Total Rhizome Length	Rhizome Internode Number
OG-1	H4	7	11	0.2444	0.27	0.0697	0.1256	0.6156	0.3811	0.5875	0.275	59.3	39
OG-2	H4	3	12	0.1136	0.1812	0.1076	0.0324	0.5868	0.4155	0.5277	0.161	41.9	24
OG-3	H4	5	3	0.0658	0.1191	0.0456	0.1569	0.4313	0.4	0.4618	0.1023	30.2	15
OG-4	H4	7	2	0.1145	0.0992	0.0518	0.0969	0.5208	0.2762	0.3215	0.0898	17.4	11
OG-5	H4	3	7	0.0962	0.0687	0.035	0.1915	0.4731	0.2902	0.408	0.0872	25.3	14
OG-6	H4	7	13	0.2454	0.2277	0.0594	0.1068	0.633	0.3578	0.7271	0.2269	48.9	24
OG-7	H4	10	10	0.3154	0.3157	0.1257	0.0688	0.7915	0.6023	0.7636	0.2	47.1	27
OG-8	H4	9	6	0.5235	0.3947	0.1231	0.0781	0.7574	0.583	0.9572	0.2239	48.6	28
OG-9	H4	8	2	0.3398	0.4426	0.1102	0.089	0.5674	0.5778	0.8003	0.1701	34	21
OG-10	H4	5	12	0.222	0.2347	0.0834	0.0998	0.6049	0.4681	0.9168	0.384	78.2	47
OG-11	H4	4	10	0.31	0.2333	0.0733	0.0542	0.5429	0.4196	0.61	0.3147	64.5	35
OG-12	H4	6	8	0.1248	0.1771	0.069	0.0926	0.6432	0.536	0.6925	0.1678	49.9	27
OG-13	H4	3	7	0.0894	0.1073	0.068	0.0769	0.4139	0.3759	0.4015	0.2043	46.4	34
OG-14	H4	4	11	0.1154	0.2087	0.0612	0.1683	0.4746	0.4401	0.5103	0.2182	46.5	25
OG-15	H4	5	6	0.0972	0.1436	0.0626	0.1337	0.4156	0.293	0.3718	0.0631	15	10
OG-16	H4	2	12	0.0788	0.0444	0.0148	0.1543	0.5158	0.2559	0.3306	0.1191	23.5	11
OG-17	H4	6	6	0.1436	0.1095	0.0633	0.0587	0.6052	0.2927	0.3643	0.0793	21.6	15
OG-18	H4	3	4	0.0672	0.0807	0.0497	0.0559	0.3275	0.2036	0.2042	0.1153	28.5	15
OG-19	H4	7	4	0.1346	0.1993	0.0762	0.1164	0.3561	0.2232	0.3861	0.0774	14.7	9
OG-20	H4	9	6	0.139	0.1546	0.1024	0.1869	0.5159	0.4962	0.5895	0.1521	39.4	25
OG-21	H4	11	3	0.2561	0.3239	0.1115	0.0871	0.7103	0.4262	0.7786	0.2469	61.1	33
OG-22	H4	7	7	0.1989	0.2699	0.0836	0.0587	0.6001	0.3633	0.7089	0.3898	78.7	49
OG-23	H4	8	2	0.2291	0.294	0.0684	0.0692	0.4717	0.3512	0.4953	0.1548	27	14
OG-24	H4	1	8	0.0941	0.1194	0.0767	0.1056	0.461	0.3602	0.4126	0.2508	58.1	33
OG-25	H4	9	3	0.2274	0.3759	0.1496	0.1101	0.6002	0.3767	0.6109	0.2058	44	33
OG-26	H4	5	6	0.1425	0.0821	0.0492	0.0439	0.4522	0.3558	0.4301	0.1448	26.9	18
OG-27	H4	5	10	0.2183	0.2156	0.081	0.098	0.5937	0.5381	0.5903	0.1897	43.9	25
OG-28	H4	7	9	0.2596	0.2308	0.0875	0.0925	0.5913	0.5073	0.6513	0.192	41.4	26
NG-1	H4	12	3	0.5122	0.3763	0.1693	0.1626	0.4704	0.3142	0.6066	0.3788	75.9	33
NG-2	H4	4	7	0.2271	0.1275	0.1221	0.1249	0.3082	0.2666	0.2744	0.1683	33.3	18
NG-3	H4	8	1	0.1623	0.1047	0.0614	0.1108	0.2483	0.155	0.2079	0.1014	23.3	11
NG-4	H4	1	10	0.1794	0.1884	0.116	0.1648	0.3851	0.2721	0.3112	0.4249		56
NG-5	H4	1	9	0.0997	0.1365	0.0624	0.0976	0.3492	0.2352	0.3059	0.1572	44.3	29
NG-6	H4	5	5	0.2918	0.2148	0.1035	0.1731	0.4008	0.2356	0.3351	0.3824	69.5	35
NG-7	H4	4	8	0.1007	0.1069	0.0538	0.121	0.3607	0.2328	0.3589	0.1835	41.7	24
NG-8	H4	5	7	0.3406	0.2553	0.113	0.1912	0.4482	0.3938	0.4993	0.2585	62.4	37
NG-9	H4	1	6	0.0741	0.0771	0.0499	0.1369	0.1955	0.1203	0.32	0.0838	29.1	20
NG-10	H4	3	4	0.0897	0.1125	0.0797	0.1416	0.2795	0.2431	0.3216	0.2729	60.9	27
NG-11	H4	4	4	0.153	0.0898	0.0378	0.0526	0.1464	0.1258	0.1106	0.1049	34	21
NG-12	H4	8	5	0.2755	0.2107	0.1139	0.2117	0.3569	0.271	0.4005	0.1643	55.6	28
NG-13	H4	9	1	0.1174	0.1257	0.1063	0.172	0.3204	0.203	0.2499	0.2046	38.2	23
NG-14	H4	2	10	0.2755	0.2359	0.1714	0.237	0.5343	0.3633	0.3495	0.1167	36.9	21
NG-15	H4	5	6	0.2019	0.1504	0.1058	0.1889	0.4346	0.3384	0.4461	0.0384	14.7	7
NG-16	H4	6	4	0.2758	0.1913	0.1281	0.1575	0.3576	0.1394	0.2035	0.0624	19	11
NG-17	H4	3	6	0.2293	0.1951	0.1126	0.2131	0.4003	0.2864	0.4374	0.362	77.2	33
NG-18	H4	4	3	0.1085	0.0945	0.0609	0.1538	0.2538	0.1838	0.2075	0.0742	26.5	17
NG-19	H4	9	1	0.2898	0.2412	0.1523	0.1631	0.3785	0.3417	0.4731	0.0604	19.9	12
NG-20	H4	7	5	0.325	0.3072	0.1344	0.2081	0.3833	0.3037	0.4058	0.3256	65.5	32
NG-21	H4	8	2	0.1482	0.2208	0.1252	0.2114	0.3643	0.2356	0.2477	0.1256	29.3	15
NG-22	H4	4	7	0.4546	0.4474	0.1202	0.2025	0.4679	0.3404	0.4806	0.4556	76.5	39
NG-23	H4	4	4	0.1589	0.0671	0.0499	0.2013	0.2324	0.2525	0.1556	0.0884	21.8	13
NG-24	H4	5	1	0.0835	0.0919	0.0718	0.1096	0.1956	0.1116	0.1276	0.0374	10.1	5
NG-25	H4	10	3	0.2042	0.2225	0.1163	0.1829	0.3401	0.1718	0.245	0.1705	36.2	16
